# Supplementary material for: Carbon nanotubes implanted manganese-based MOFs for simultaneous detection of biomolecules in body fluids
Source: Royal Society of Chemistry journal article supplement (doi:10.1039/c5an02441b), 2016-01-01
Supplement: c5an02441b1.pdf [file c5an02441b1.pdf]

## Supporting Information

### **Carbon Nanotubes Implanted Manganese-based MOFs for Simultaneous Detection of Biomolecules in Body Fluids**

Min-Qiang Wang,<sup>a</sup> Cui Ye,<sup>b</sup> Shu-Juan Bao,<sup>\*, a</sup> Yan Zhang,<sup>a</sup> Ya-Nan Yu<sup>a</sup> and Maowen Xu<sup>a</sup>

<sup>a</sup> Institute for Clean Energy & Advanced Materials, Faculty of Materials and Energy, Southwest University, Chongqing 400715, P.R. China

<sup>b</sup> Key Laboratory of Luminescent and Real-Time Analytical Chemistry, Ministry of Education, College of Chemistry and Chemical Engineering, Southwest University, Chongqing 400715, P. R. China



**Fig.S1.** Nitrogen adsorption-desorption isotherms at 77 K for (a) pure Mn-BDC and Mn-BDC@MWCNT composites and (b) their pore size distributions.

**Table. S1** The BET surface area, pore volume and average pores radius of all samples.

| Samples                 | BET Surface Area (m <sup>2</sup> /g) | Pore Volume<br>(cc/g) | Average Pores Radius (nm) |
|-------------------------|--------------------------------------|-----------------------|---------------------------|
| Pure Mn-BDC             | 77.91                                | 0.085                 | 17.008                    |
| Mn-BDC@MWCNT composites | 112.72                               | 0.256                 | 17.035                    |

**Table S2** Comparison of the response characteristics of different modified electrodes

| Electrode         | Linear response range ( $\mu\text{M}$ ) |          |           | Limit of detection ( $\mu\text{M}$ ) |       |       | RSD (%)       |      |      | Ref       |
|-------------------|-----------------------------------------|----------|-----------|--------------------------------------|-------|-------|---------------|------|------|-----------|
|                   | AA                                      | DA       | UA        | AA                                   | DA    | UA    | AA            | DA   | UA   |           |
| GO-PAN/GCE        | 150-1050                                | 1-14     | 3-26      | 50                                   | 0.5   | 1     | 1.45          | 4.75 | 4.22 | 1         |
| PDAox-PTCA/GCE    | 76-3900                                 | 0.6-253  | 1.8-238   | 25.3                                 | 0.2   | 0.6   | Less than 7.8 |      |      | 2         |
| GC/MWCNT-FeNAZ-CH | 7.77-833                                | 7.35-833 | 0.23-83.3 | 1.11                                 | 1.05  | 0.033 | -             | -    | -    | 3         |
| MWCNT-PEDOT       | 100-2000                                | 10-330   | 10-250    | 100                                  | 10    | 10    | 3.1           | 2.3  | 3.9  | 4         |
| PG-GCE            | 9-2314                                  | 5-710    | 6-1330    | 6.45                                 | 2.00  | 4.82  | -             | -    | -    | 5         |
| Mn-BDC@MWCNTs/GCE | 0.1-1150                                | 0.01-500 | 0.02-1100 | 0.01                                 | 0.002 | 0.005 | 2.1           | 1.8  | 2.5  | This work |



**Fig. S2.** Current-time response curve of the Mn-BDC@MWCNTs/GCE sensor upon successive addition of (A) 20  $\mu\text{M}$  AA, (B) 20  $\mu\text{M}$  DA, and (C) 20  $\mu\text{M}$  UA and other chemicals in a pH=7.5 buffer with applied potentials of -0.09, 0.12, and 0.27 V for AA, DA, and UA, respectively.

**Table S3** Results of the recovery analysis of AA, DA and UA in real samples at Mn-BDC@MWCNTs/GCE

| Sample  | Analyte | Detected ( $\mu\text{M}$ ) | Spiked ( $\mu\text{M}$ ) | Found ( $\mu\text{M}$ ) | Recovery (%) |
|---------|---------|----------------------------|--------------------------|-------------------------|--------------|
| Urine 1 | AA      | -                          | 40                       | 39.3                    | 98.25        |
|         | DA      | -                          | 20                       | 19.3                    | 96.50        |
|         | UA      | 57.1                       | 15                       | 71.3                    | 98.89        |
| Urine 2 | AA      | -                          | 30                       | 30.4                    | 101.30       |
|         | DA      | -                          | 30                       | 29.1                    | 97.00        |
|         | UA      | 32.4                       | 20                       | 51.7                    | 98.66        |
| Urine 3 | AA      | -                          | 100                      | 98.6                    | 98.60        |
|         | DA      | -                          | 50                       | 50.4                    | 100.80       |
|         | UA      | 44.3                       | 20                       | 64.1                    | 99.69        |

### References

- (1). Y. Bao, J. Song, Y. Mao, D. Han, F. Yang, L. Niu and A. Ivaska, *Electroanalysis*, 2011, 23, 878-884.
- (2). X. Liu, X. Ou, Q. Lu, J. Zhang, S. Chen and S. Wei, *Rsc Adv*, 2014, 4, 42632-42637.
- (3). M. Noroozifar, M. Khorasani-Motlagh, R. Akbari and M. B. Parizi, *Biosen. Bioelectron*, 2011, 28, 56-63.
- (4). K. C. Lin, T. H. Tsai and S. M. Chen, *Biosen. Bioelectron*, 2010, 26, 608-614.
- (5). S. Qi, B. Zhao, H. Tang and X. Jiang, *Electrochim Acta*, 2015, 395-402.
